# Supplementary material for: Coffee consumption and risk of myocardial infarction: a dose-response meta-analysis of observational studies
Source: PubMed Central journal article supplement (PMC5940396; doi:10.18632/oncotarget.23947), 2018-01-04
Supplement: oncotarget-09-21530-s001.pdf [file oncotarget-09-21530-s001.pdf]

## **Coffee consumption and risk of myocardial infarction: a dose-response meta-analysis of observational studies**

### **SUPPLEMENTARY MATERIALS**

**Supplementary Table 1: Quality assessment of the included studies (cohort studies).** See\_ Supplementary\_Table 1

**Supplementary Table 2: Quality assessment of the included studies (case-control studies).** See\_ Supplementary\_Table 2

**Supplementary Table 3: Characteristics of included studies.** See\_ Supplementary\_Table 3

**A**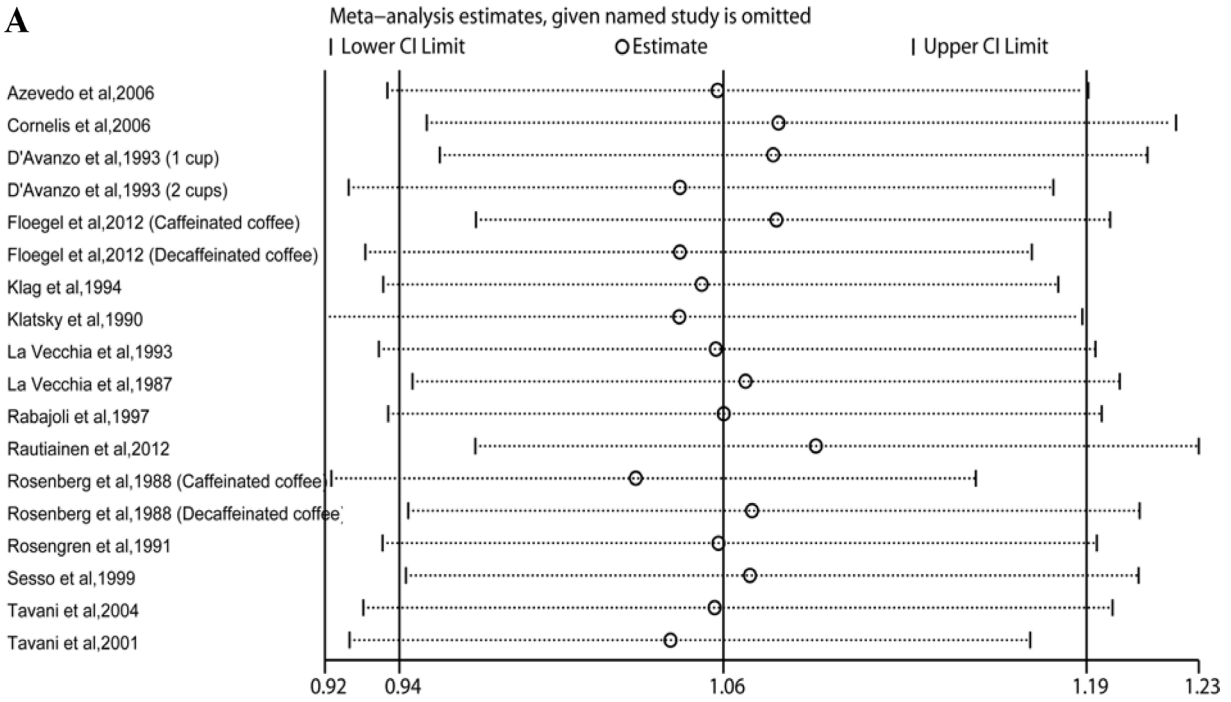**B**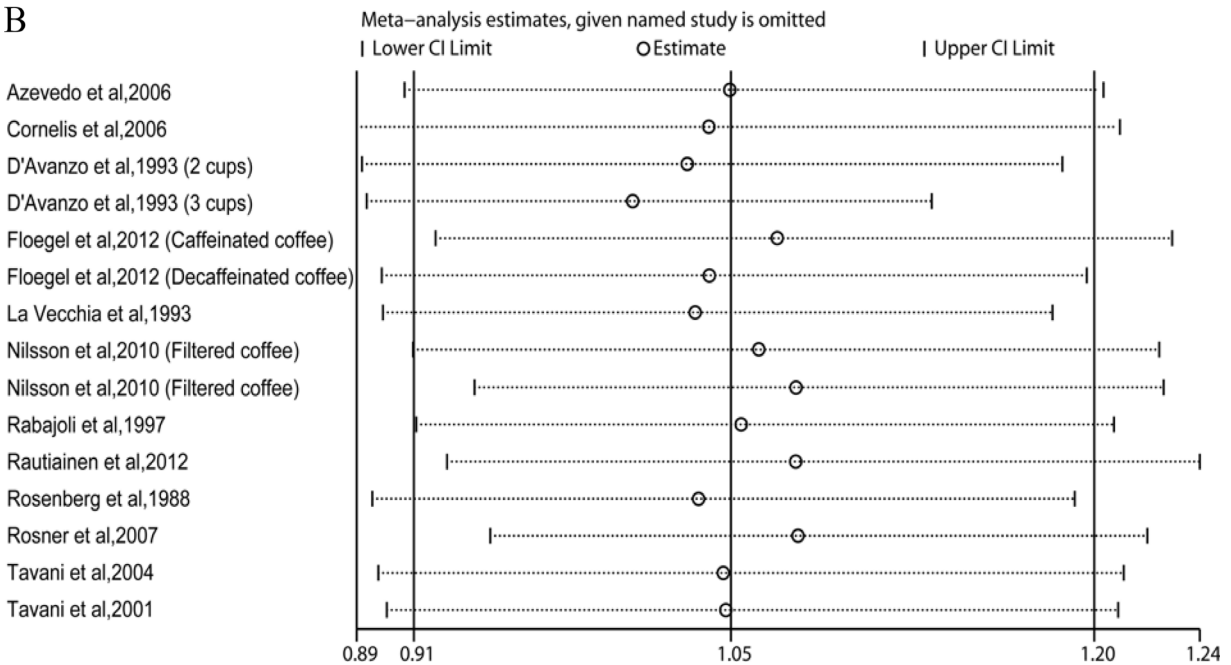

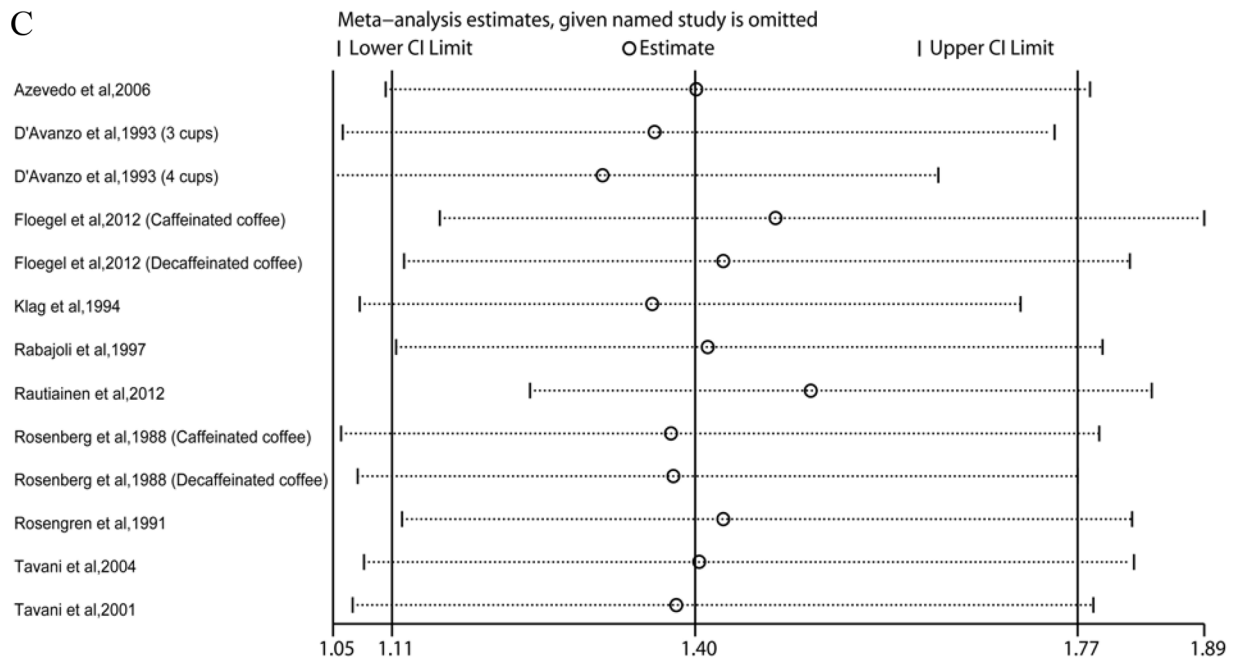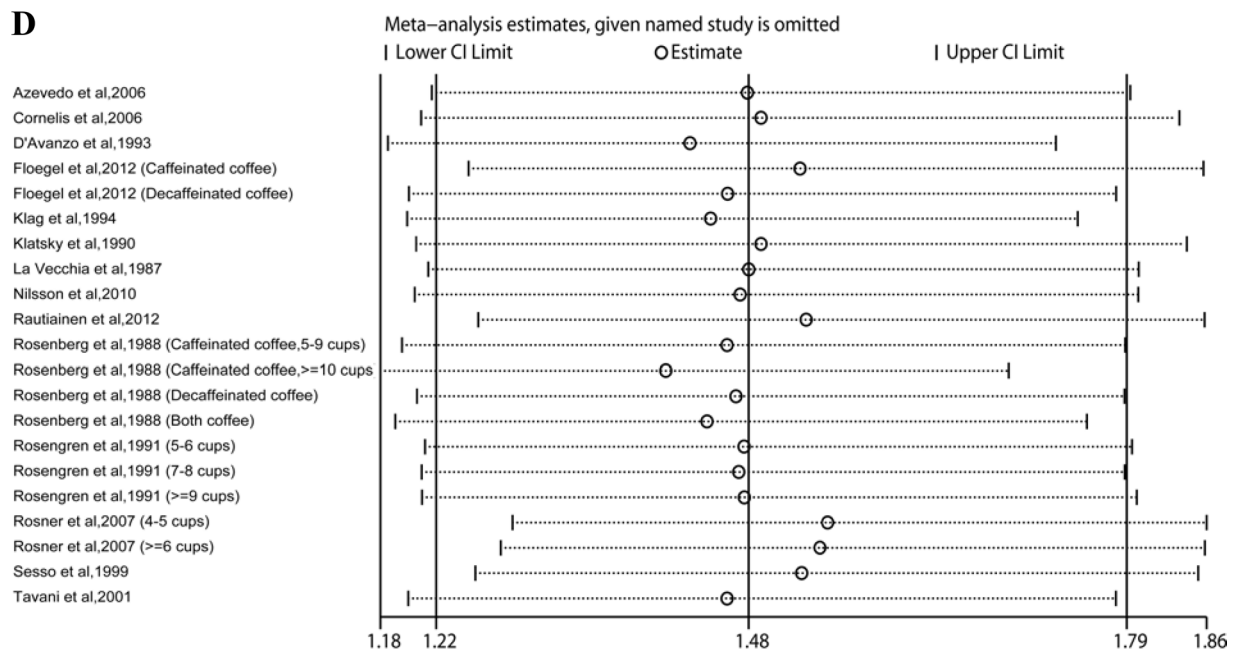

**Supplementary Figure 1: Sensitivity analysis.** Relative risk of myocardial infarction associated with consumption of 1-2 cups (A), 2-3 cups (B), 3-4 cups (C), and over 4 cups (D) of coffee per day in comparison with consumption of less than 1 cup per day by omitting one study in turn.
